# Supplementary material for: Color tuning and energy transfer in Eu2+/Mn2+-doped Ba3Y(PO4)3 eulytite-type orthophosphate phosphors
Source: Royal Society of Chemistry journal article supplement (doi:10.1039/c5ra06347g), 2015-01-01
Supplement: c5ra06347g1.pdf [file c5ra06347g1.pdf]

## Electronic supplementary information (ESI)

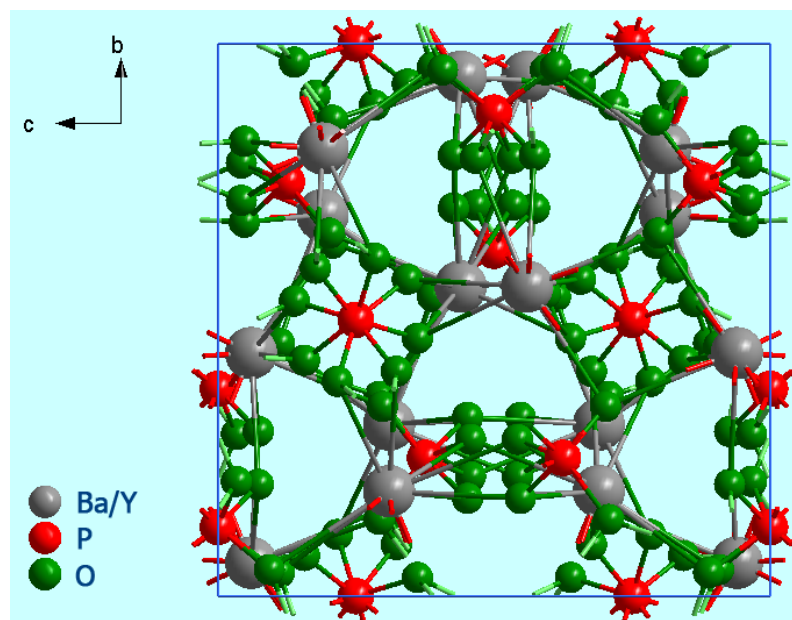

**Figure S1.** The crystal structure of  $\text{Ba}_3\text{Y}(\text{PO}_4)_3$  viewing along  $[100]$  direction.

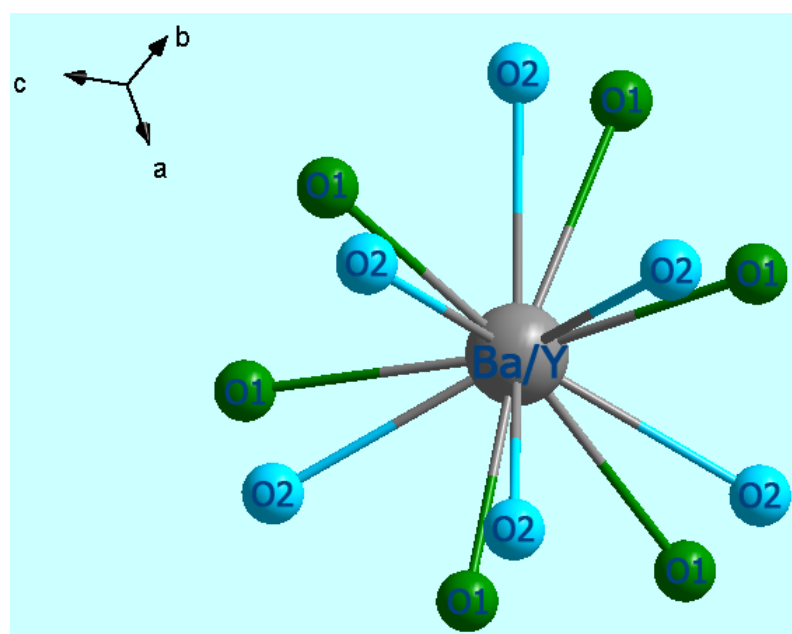

**Figure S2.** The coordination environment of Ba/Y viewed along  $[111]$  direction.

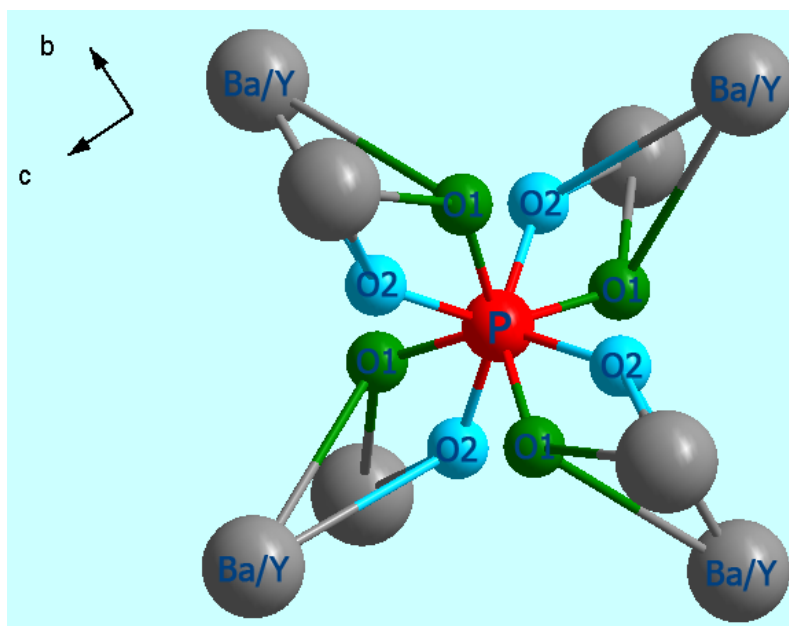

**Figure S3.** The coordination environment of P viewed along [100] direction.

**Description of the Crystal Structure:** In  $\text{Ba}_3\text{Y}(\text{PO}_4)_3$  crystal,  $\text{Ba}^{2+}$  and  $\text{Y}^{3+}$  are disordered in a single crystallographic site, whereas the oxygen atoms are disordered over two orientations (O1 and O2 with 35% and 65% occupancy factors, respectively), giving rise to rotational disorder of the phosphate anion.

**Table S1.** Comparison of integral area of the four Gaussian components for  $\text{Ba}_3\text{Ln}(\text{PO}_4)_3:\text{Eu}^{2+}$

| $\text{Ba}_3\text{Ln}(\text{PO}_4)_3:\text{Eu}^{2+}$ | Integral area of the four Gaussian components |   |       |   |       |  |       |   |     |
|------------------------------------------------------|-----------------------------------------------|---|-------|---|-------|--|-------|---|-----|
|                                                      | A                                             |   | B     |   | C     |  | D     |   | SUM |
| <b>Ln</b>                                            |                                               |   |       |   |       |  |       |   |     |
| <b>Lu</b>                                            | 0.052                                         | ↑ | 0.775 | ↑ | 0.038 |  | 0.135 | ↓ | 1   |
| <b>Y</b>                                             | 0.050                                         |   | 0.767 |   | 0.036 |  | 0.147 |   | 1   |
| <b>Gd</b>                                            | 0.041                                         |   | 0.695 |   | 0.037 |  | 0.227 |   | 1   |
